# Supplementary material for: Identification of MAD2L1 as a Potential Biomarker in Hepatocellular Carcinoma via Comprehensive Bioinformatics Analysis
Source: Hindawi journal article supplement (doi:10.1155/2022/9868022), 2022-01-01
Supplement: f2 [file 9868022.f2.pdf]

**Supplementary Table 2 Top ten hub genes with higher degree of connectivity.**

| Gene symbol | Gene description                                          | Score |
|-------------|-----------------------------------------------------------|-------|
| CCNB1       | Cyclin B1                                                 | 29    |
| MAD2L1      | mitotic arrest deficient 2 like 1                         | 27    |
| CCNA2       | Cyclin B1                                                 | 27    |
| AURKA       | aurora kinase A                                           | 26    |
| ZWITN       | ZW10 interacting kinetochore protein                      | 26    |
| PRC1        | protein regulator of cytokinesis 1                        | 25    |
| HMMR        | hyaluronan mediated motility receptor                     | 25    |
| TPX2        | TPX2 microtubule nucleation factor                        | 25    |
| EZH2        | enhancer of zeste 2 polycomb repressive complex 2 subunit | 25    |
| OIP5O       | Opa interacting protein 5                                 | 25    |
